# Supplementary material for: Do the Dietary Intakes of Pregnant Women Attending Public Hospital Antenatal Clinics Align with Australian Guide to Healthy Eating Recommendations?
Source: MDPI journal article supplement (doi:10.3390/nu12082438), 2020-08-13
Supplement: s1 [file s1]

# Supplementary Table S1

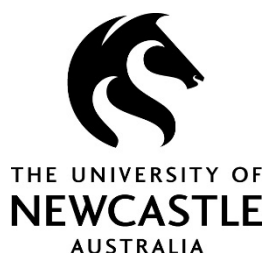

## The association between diet quality during pregnancy and maternal and infant health and health care costs **Questionnaire**

*Thank you for completing this survey.*

*Please answer every question you can. If you are unsure about how to answer a question, mark the response for the closest answer to how you feel.*

*Please read the instructions above each question carefully. Some require you to only answer those options which are applicable to you. Other questions require you to mark one answer on each line.*

***You will be asked to provide your Medical record number, so please have it ready. Please remember that your details will remain confidential.***

*If you feel distressed now or throughout completing the survey and would like someone to talk to, you could ring Lifeline on 131 114 (local call) or NSW Mental Health access line 1800 011 511*

### **Section A- About you**

*The following questions are about you:*

|                                                                                 |
|---------------------------------------------------------------------------------|
| <b>1. Date of birth</b>                                                         |
| Day    /    Month    /    Year                                                  |
| <b>2. What is the highest qualification you have completed (tick one)?</b>      |
| <input type="checkbox"/> No formal qualifications                               |
| <input type="checkbox"/> School certificate (Year 10 or equivalent)             |
| <input type="checkbox"/> Higher school certificate (Year 12 or equivalent)      |
| <input type="checkbox"/> Trade/Apprenticeship (e.g. Hairdresser/Chef)           |
| <input type="checkbox"/> Certificate/Diploma (e.g. childcare, technician)       |
| <input type="checkbox"/> University Degree                                      |
| <input type="checkbox"/> Higher University Degree (e.g. Grad Dip, Masters, PhD) |

|                                                                                                                                                                                                                        |                          |                          |
|------------------------------------------------------------------------------------------------------------------------------------------------------------------------------------------------------------------------|--------------------------|--------------------------|
| <b>3. Are you of Aboriginal or Torres Strait Islander origin? Circle one number only</b>                                                                                                                               |                          |                          |
| <input type="checkbox"/> No                                                                                                                                                                                            |                          |                          |
| <input type="checkbox"/> Aboriginal                                                                                                                                                                                    |                          |                          |
| <input type="checkbox"/> Torres Strait Islander                                                                                                                                                                        |                          |                          |
| <input type="checkbox"/> Both Aboriginal and Torres Strait Islander                                                                                                                                                    |                          |                          |
| <b>4. In which country were you born? Circle one number only</b>                                                                                                                                                       |                          |                          |
| <input type="checkbox"/> Australia                                                                                                                                                                                     |                          |                          |
| <input type="checkbox"/> England                                                                                                                                                                                       |                          |                          |
| <input type="checkbox"/> New Zealand                                                                                                                                                                                   |                          |                          |
| <input type="checkbox"/> Other, please specify: _____                                                                                                                                                                  |                          |                          |
| <b>5. What is your PRESENT marital status? (Tick one)</b>                                                                                                                                                              |                          |                          |
| <input type="checkbox"/> Married                                                                                                                                                                                       |                          |                          |
| <input type="checkbox"/> Defacto                                                                                                                                                                                       |                          |                          |
| <input type="checkbox"/> Separated, but not divorced                                                                                                                                                                   |                          |                          |
| <input type="checkbox"/> Divorced                                                                                                                                                                                      |                          |                          |
| <input type="checkbox"/> Widowed                                                                                                                                                                                       |                          |                          |
| <input type="checkbox"/> Never married                                                                                                                                                                                 |                          |                          |
| <b>6. Do you speak another language at home ? (Tick one)ds</b>                                                                                                                                                         |                          |                          |
| <input type="checkbox"/> No I only speak English at home                                                                                                                                                               |                          |                          |
| <input type="checkbox"/> Yes<br>List other languages                                                                                                                                                                   |                          |                          |
| <b>6. What is the average gross (before tax) income per week of yourself and your household (e.g. you and your partner, or you and your parents sharing a house)? Tick one for yourself and one for your household</b> | <b>You</b>               | <b>Household</b>         |
| No income                                                                                                                                                                                                              | <input type="checkbox"/> | <input type="checkbox"/> |
| \$1-\$199 (\$1-\$10,399 annually)                                                                                                                                                                                      | <input type="checkbox"/> | <input type="checkbox"/> |
| \$200-\$299 (\$10,400-\$15,599 annually)                                                                                                                                                                               | <input type="checkbox"/> | <input type="checkbox"/> |
| \$300-\$399 (\$15,600-\$20,799 annually)                                                                                                                                                                               | <input type="checkbox"/> | <input type="checkbox"/> |
| \$400-\$599 (\$20,800-\$31,199 annually)                                                                                                                                                                               | <input type="checkbox"/> | <input type="checkbox"/> |
| \$600-\$799 (\$31,200-\$41,599 annually)                                                                                                                                                                               | <input type="checkbox"/> | <input type="checkbox"/> |
| \$800-\$999 (\$41,600-\$51,999 annually)                                                                                                                                                                               | <input type="checkbox"/> | <input type="checkbox"/> |
| \$1,000-\$1,249 (\$52,000-\$64,999 annually)                                                                                                                                                                           | <input type="checkbox"/> | <input type="checkbox"/> |

|                                                     |                          |                          |
|-----------------------------------------------------|--------------------------|--------------------------|
| \$1,250-\$1,499 (\$65,000-\$77,999 annually)        | <input type="checkbox"/> | <input type="checkbox"/> |
| \$1,500-\$1,999 (\$78,000-\$103,999 annually)       | <input type="checkbox"/> | <input type="checkbox"/> |
| \$2,000 or more (\$104,000 or more annually)        | <input type="checkbox"/> | <input type="checkbox"/> |
| Don't know                                          | <input type="checkbox"/> | <input type="checkbox"/> |
| Don't want to answer                                | <input type="checkbox"/> | <input type="checkbox"/> |
| I live alone (household income is the same as mine) |                          | <input type="checkbox"/> |

**7. How do you manage on the income you have available? Tick one**

☐ It is impossible

☐ It is difficult all of the time

☐ It is difficult some of the time

☐ It is not too bad

☐ It is easy

**8. What is your postcode?**

## **Section B- About your health**

**1. Are you currently taking any medications or over-the-counter (including herbal tablets, multivitamins etc.)? (tick one)**

☐ Yes

☐ No *Go to Question 3*

**2. Please list the medications, herbal tablets or multivitamins:**

---

---

---

**3. Do you currently smoke tobacco products? (tick one)**

☐ Yes, daily

☐ Yes, at least once a week *Go to Section C*

☐ Yes, but less often than once a week *Go to Section C*

☐ No, not at all *Go to Section C*

**4. On an average day, how many cigarettes do you smoke?**

**5. How soon after waking up do you smoke? (tick one)**

☐ Within 5 minutes

☐ 6 to 30 minutes

☐ 31 to 60 minutes

☐ After 60 minutes

**6. Have you smoked at least 100 cigarettes or a similar amount of tobacco in your life? (tick one)**

☐ Yes

☐ No

☐ Not sure

**7. Have you been diagnosed or treated for any of the following health conditions:**

☐ High blood cholesterol or triglyceride levels

☐ High blood pressure (hypertension)

☐ Preeclampsia

☐ Polycystic Ovarian Syndrome (PCOS)

|                                                                                                                         |
|-------------------------------------------------------------------------------------------------------------------------|
| <input type="checkbox"/> Obesity                                                                                        |
| <input type="checkbox"/> Type 2 diabetes (NIDDM or adult onset diabetes)                                                |
| <input type="checkbox"/> Pre-diabetes / Impaired Glucose Tolerance or Impaired Fasting Glucose                          |
| <input type="checkbox"/> Gestational Diabetes                                                                           |
| <input type="checkbox"/> Heart conditions                                                                               |
| <input type="checkbox"/> None of these conditions                                                                       |
| <b>8. How many children do you have (please include all children under the age of 18 years living in the household)</b> |
|                                                                                                                         |
| <b>9. Please enter the date of each child's birth in the following (DD/MM/YY)</b>                                       |
| Child 1                                                                                                                 |
| Child 2                                                                                                                 |
| Child 3                                                                                                                 |
| Child 4                                                                                                                 |
| Child 5                                                                                                                 |
| Child 6                                                                                                                 |
| Child 7                                                                                                                 |

### **Section C- About your pregnancies**

**1. How many weeks pregnant are you?**

|                                                                                    |
|------------------------------------------------------------------------------------|
|                                                                                    |
| <b>2. What was your weight before your current pregnancy?</b>                      |
|                                                                                    |
| <b>3. When was this weight measure collected?</b>                                  |
|                                                                                    |
| <b>4. How much weight have you gained during your current pregnancy?</b>           |
|                                                                                    |
| <b>5. How much weight did you gain during each of your pregnancies (kilograms)</b> |
| Child 1                                                                            |
| Child 2                                                                            |
| Child 3                                                                            |
| Child 4                                                                            |
| Child 5                                                                            |
| Child 6                                                                            |
| Child 7                                                                            |
| <b>6. What is your height?</b>                                                     |

### **Section D: Pregnancy healthcare**

|                                                                                                                        |
|------------------------------------------------------------------------------------------------------------------------|
| <b>1. Have you receive any advice from health professionals on diet during pregnancy?</b>                              |
| <input type="checkbox"/> Yes                                                                                           |
| <input type="checkbox"/> No                                                                                            |
| <input type="checkbox"/> Unsure                                                                                        |
| <b>2. Did you receive any information on weight loss after the birth of your baby from your most recent pregnancy?</b> |
| <input type="checkbox"/> Yes                                                                                           |
| <input type="checkbox"/> No                                                                                            |

|                                                                                                              |
|--------------------------------------------------------------------------------------------------------------|
| <input type="checkbox"/> Not applicable as this is my first pregnancy                                        |
| <b>3. Have you had a dental check up in the last 6 months?</b>                                               |
| <input type="checkbox"/> Yes                                                                                 |
| <input type="checkbox"/> No (go to question 4)                                                               |
| <b>4. Have you had a dental check up in the last 12 months?</b>                                              |
| <input type="checkbox"/> Yes                                                                                 |
| <input type="checkbox"/> No                                                                                  |
| <b>5. In the past 12 months was there any time when you ran out of food and couldn't afford to buy more?</b> |
| <input type="checkbox"/> Yes → Go to Q6                                                                      |
| <input type="checkbox"/> No                                                                                  |
| <b>6. When this happened, did you go without food?</b>                                                       |
| <input type="checkbox"/> Yes                                                                                 |
| <input type="checkbox"/> No                                                                                  |

### **Section D- other diet questions**

These next questions are on foods that are not included in the Australian eating survey.

Think about what you ate in the last 3 to 6 months when you answers these questions

How often do you have the following foods?

|  |       |           |               |               |              |                    |
|--|-------|-----------|---------------|---------------|--------------|--------------------|
|  | Never | Less than | 1-3 per month | Once per week | 2-4 per week | 5 or more per week |
|--|-------|-----------|---------------|---------------|--------------|--------------------|

|                                                                        |  |                |  |  |  |  |
|------------------------------------------------------------------------|--|----------------|--|--|--|--|
|                                                                        |  | once per month |  |  |  |  |
| Pate or meat spreads                                                   |  |                |  |  |  |  |
| Salads (pre prepared) or (pre packaged) from salad bars or smorgasbord |  |                |  |  |  |  |
| Soft serve ice cream                                                   |  |                |  |  |  |  |

In order for us to obtain your medical record and ObsetriX Data can you please complete the following:

First Name:

Middle Name:

Surname

Medical record number:

Doctors Name :

Expected due date:

What hospital are you booked into to have your baby? (choose one)

- ☐ Belmont Hospital
- ☐ Glen Innes Hospital
- ☐ Gloucester Soldier's Memorial Hospital
- ☐ Gunnedah Hospital
- ☐ Inverell Hospital
- ☐ John Hunter Hospital
- ☐ Maitland Hospital
- ☐ Manning Hospital
- ☐ Moree Hospital
- ☐ Muswellbrook Hospital
- ☐ Narrabri Hospital
- ☐ Scott Memorial Hospital - Scone



- ☐ Singleton Hospital
- ☐ Tamworth Hospital

***Thank you for completing this survey, please click on this link for the next section: Australian Eating Survey***

**Supplementary Figure S1:** Recruitment for pregnant women attending the John Hunter Hospital Antenatal Clinic, in Newcastle, NSW.

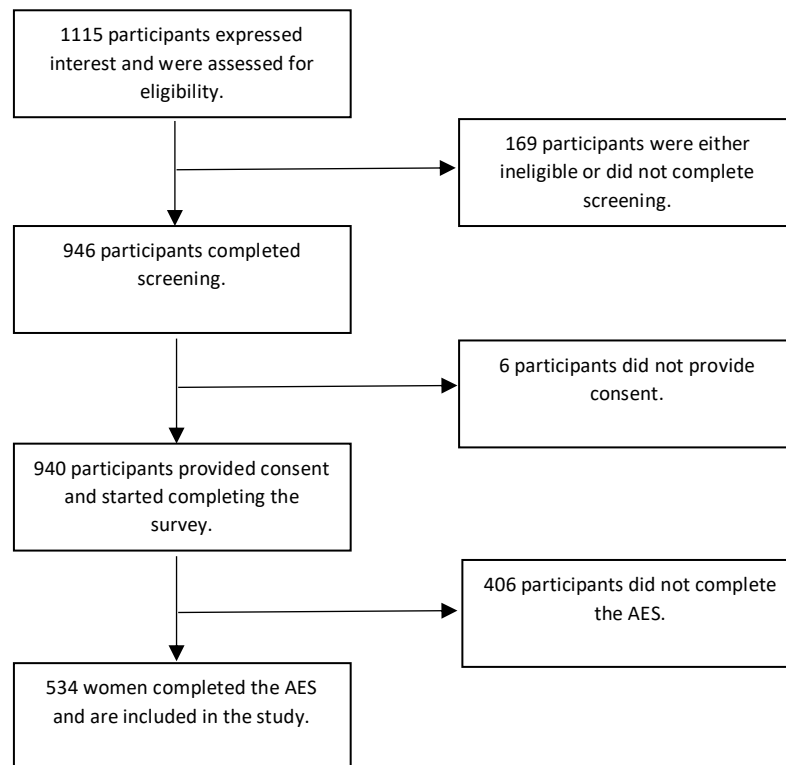

*Flow diagram for the process of recruitment for pregnant women attending the John Hunter Hospital antenatal clinic.*

**Supplementary Table S2:** Daily food consumption differences in pregnant women from the John Hunter Hospital antenatal clinic, by BMI category.

|                                          |                        | BMI <18.5<br>kg/m <sup>2</sup> (n=20)<br>Median (IQR) | BMI 18.5-24.9<br>kg/m <sup>2</sup> (n=171)<br>Median (IQR) | BMI 25-29.9<br>kg/m <sup>2</sup> (n=80)<br>Median (IQR) | BMI ≥30<br>kg/m <sup>2</sup> (n=175)<br>Median (IQR) | Missing BMI<br>(n=88)<br>Median (IQR) |
|------------------------------------------|------------------------|-------------------------------------------------------|------------------------------------------------------------|---------------------------------------------------------|------------------------------------------------------|---------------------------------------|
| Food group<br>servings<br>(servings/day) | AGHE<br>(serves/day)   |                                                       |                                                            |                                                         |                                                      |                                       |
| Breads and cereals                       | 8.5                    | 2.8 (1.9-3.3)                                         | 3.0 (2.1-4.1)                                              | 2.6 (1.7-3.6)                                           | 2.4 (1.5-3.4)                                        | 2.5 (1.3-3.8)                         |
| Fruit                                    | 2                      | 1.7 (1.4-2.6)                                         | 2.0 (1.2-2.9)                                              | 1.8 (1.7-2.4)                                           | 1.4 (0.8-2.1)                                        | 1.7 (0.8-2.6)                         |
| Vegetables/legumes                       | 5                      | 3.6 (2.9-4.5)                                         | 3.9 (3.0-5.4)                                              | 4.0 (2.0-5.0)                                           | 3.8 (2.9-5.2)                                        | 3.7 (2.5-5.0)                         |
| Dairy/alternatives                       | 2.5                    | 1.1 (0.7-1.8)                                         | 1.4 (0.9-1.9)                                              | 1.4 (0.9-1.8)                                           | 1.2 (0.6-1.8)                                        | 1.1 (0.6-1.8)                         |
| Meat/alternatives                        | 3.5                    | 2.0 (1.3-2.8)                                         | 2.4 (1.7-3.2)                                              | 2.3 (1.6-3.3)                                           | 2.3 (1.7-3.3)                                        | 2.2 (1.6-3.2)                         |
| <b>Macronutrients</b>                    | <b>NRVs (unit/day)</b> |                                                       |                                                            |                                                         |                                                      |                                       |
| Energy (kJ)<br>With dietary fibre        | -                      | 8125 (6948-8985)                                      | 8680 (6802-10123)                                          | 8240 (6468-9966)                                        | 7658 (6208-9360)                                     | 7681 (5516-10510)                     |
| CHO (% E)                                | AMDR 45-65%            | 46 (43-50)                                            | 46 (42-49)                                                 | 46 (39-50)                                              | 44 (40-50)                                           | 45 (41-52)                            |
| Protein (% E)                            | AMDR 15-25%            | 16 (15-18)                                            | 18 (16-19)                                                 | 17 (16-20)                                              | 18 (17-21)                                           | 18 (16-20)                            |
| Fat (% E)                                | AMDR 20-35%            | 37 (34-39)                                            | 37 (34-39)                                                 | 37 (34-41)                                              | 38 (35-41)                                           | 37 (33-40)                            |
| Sat. Fat (% E)                           | <10%                   | 14 (12-15)                                            | 14 (12-15)                                                 | 15 (13-16)                                              | 14 (13-16)                                           | 14 (12-16)                            |
| Omega 3 (mg)                             | -                      | 131.5 (96.5-223.5)                                    | 176.3 (121-275)                                            | 179.8 (116.0-246.5)                                     | 169.5 (108-252)                                      | 169.4 (84.9-259.2)                    |
| Fibre (g)                                | 28                     | 27.5 (24.2-29.5)                                      | 28.2 (22-36)                                               | 25.9 (21-32)                                            | 23.4 (18-30)                                         | 24.7 (17.1-35.4)                      |
| % energy from core foods                 | -                      | 66 (50-73)                                            | 69 (62-78)                                                 | 64 (57-73)                                              | 67 (58-75)                                           | 65 (56-75)                            |
| % energy from non-core foods             | -                      | 34 (28-51)                                            | 31 (23-38)                                                 | 36 (27-75)                                              | 33 (26-42)                                           | 36 (25-45)                            |
| <b>Micronutrients</b>                    | <b>NRVs (unit/day)</b> |                                                       |                                                            |                                                         |                                                      |                                       |
| Thiamin (mg)                             | EAR 1.2                | 1.2 (1.0-1.8)                                         | 1.6 (1.0-1.8)                                              | 1.5 (1.1-2.0)                                           | 1.4 (1.1-1.8)                                        | 1.4 (1.1-2.0)                         |
| Riboflavin (mg)                          | EAR 1.2                | 1.8 (1.3-2.4)                                         | 2.1 (1.6-2.6)                                              | 2.0 (1.5-2.5)                                           | 1.8 (1.4-2.4)                                        | 1.8 (1.3-2.5)                         |
| Niacin equivalents (mg)                  | EAR 14                 | 32.1 (29.1-39.2)                                      | 38.4 (29.6-44.7)                                           | 35.7 (29.7-44.6)                                        | 34.8 (26.9-46.0)                                     | 35.3 (27.0-46.3)                      |
| Vitamin C (mg)                           | EAR 40                 | 177.1 (111.1-212.7)                                   | 172.3 (122.9-217.8)                                        | 170.0 (113.5-228.9)                                     | 153.8 (105.5-215.7)                                  | 154.0 (103.5-252.6)                   |
| Dietary folate equivalents (µg)          | EAR 520                | 473.6 (390.5-639.2)                                   | 542.8 (457.4-669.8)                                        | 548.7 (424.3-682.6)                                     | 504.0 (380.2-643.5)                                  | 591.1 (382.6-672.6)                   |
| Retinol equivalents (µg)                 | EAR 550                | 760.4 (606.7-1123.0)                                  | 998.0 (732.7-1281.5)                                       | 893.4 (691.1-1161.7)                                    | 859.9 (562.5-1116.5)                                 | 891.7 (597.4-1176.1)                  |
| Magnesium (mg)<br>19-30 years old        | EAR 290                | 354.9 (282.3-375.8)                                   | 379.5 (327.5-463.8)                                        | 359.6 (309.7-443.6)                                     | 336.0 (276.2-423.4)                                  | 328.6 (253.7-450.5)                   |
| Phosphorus (mg)                          | EAR 580                | 1283.1 (1152.2-1504.8)                                | 1451.1 (1108.2-1712.5)                                     | 1346.0 (1107.8-1676.7)                                  | 1292.0 (997.8-1613.6)                                | 1290.4 (920.9-167.1)                  |
| Calcium (mg)                             | EAR 840                | 779.7 (567.7-959.3)                                   | 831.6 (638.7-1008.2)                                       | 803.0 (618.2-975.4)                                     | 731.7 (501.2-926.0)                                  | 688.6 (446.0-954.7)                   |
| Iron (mg)                                | EAR 22                 | 9.2 (7.9-10.6)                                        | 11.2 (9.0-13.3)                                            | 9.9 (8.0-12.0)                                          | 9.3 (7.4-12.0)                                       | 9.5 (7.4-13.2)                        |
| Zinc (mg)                                | EAR 9.0                | 9.8 (9.1-11.9)                                        | 11.4 (9.0-13.6)                                            | 10.8 (8.9-13.2)                                         | 10.8 (8.2-13.5)                                      | 10.1 (7.5-14.0)                       |
| Sodium (mg)                              | AI 460-920             | 1762.4 (1402.2-2102.4)                                | 1727.2 (1355.1-2161.2)                                     | 1772.5 (1415.3-2971.9)                                  | 1768.8 (1301.0-2218.6)                               | 1666.2 (1243.3-2292.6)                |
| Iodine (ug)                              | EAR 160                | 133.5 (98.7-149.8)                                    | 128.8 (99.1-158.1)                                         | 127.1 (98.0-154.8)                                      | 116.9 (83.4-153.3)                                   | 111.8 (77.1-159.6)                    |
| Potassium (mg)                           | AI 2800                | 3177.0 (2768.5-3516.6)                                | 3472.9 (2531.8-3892.2)                                     | 3311.8 (2639.2-3854.6)                                  | 2928.9 (2372.7-3753.0)                               | 3026.6 2334.5-4020.0                  |

**Supplementary Table S3:** Percentage of participants meeting AGHE and NRV recommendations, by BMI category.

|                                          |                      | BMI <18.5<br>kg/m <sup>2</sup> (n=20)<br>n(%) | BMI 18.5-24.9<br>kg/m <sup>2</sup> (n=171)<br>n(%) | BMI 25-29.9<br>kg/m <sup>2</sup> (n=80)<br>n (%) | BMI ≥30<br>kg/m <sup>2</sup> (n=175)<br>n (%) | Missing BMI<br>(n=88)<br>n (%) |
|------------------------------------------|----------------------|-----------------------------------------------|----------------------------------------------------|--------------------------------------------------|-----------------------------------------------|--------------------------------|
| Food group<br>servings<br>(servings/day) | AGHE<br>(serves/day) |                                               |                                                    |                                                  |                                               |                                |
| Breads and cereals                       | 8.5                  | 0 (0)                                         | 0 (0)                                              | 0 (0)                                            | 0 (0)                                         | 3 (3)                          |
| Fruit                                    | 2                    | 9.0 (45)                                      | 86 (50)                                            | 26 (33)                                          | 49 (28)                                       | 34 (39)                        |
| Vegetables/legumes                       | 5                    | 3.0 (15)                                      | 53 (31)                                            | 21 (26)                                          | 43 (25)                                       | 22 (25)                        |
| Dairy/alternatives                       | 2.5                  | 4.0 (20)                                      | 23 (14)                                            | 7 (9)                                            | 29 (17)                                       | 10 (11)                        |
| Meat/alternatives                        | 3.5                  | 3.0 (15)                                      | 26 (15)                                            | 13 (16)                                          | 39 (22)                                       | 16 (18)                        |
| Micronutrients                           | NRVs (unit/day)      |                                               |                                                    |                                                  |                                               |                                |
| CHO (% E)                                | AMDR 45-65%          | 13 (65)                                       | 103 (60)                                           | 47 (59)                                          | 79 (45)                                       | 45 (51)                        |
| Protein (% E)                            | AMDR 15-25%          | 15 (75)                                       | 146 (85)                                           | 66 (83)                                          | 158 (90)                                      | 70 (80)                        |
| Fat (% E)                                | AMDR 20-35%          | 7 (35)                                        | 62 (36)                                            | 27 (34)                                          | 51 (29)                                       | 30 (34)                        |
| Sat. Fat (% E)                           | <10%                 | 2 (10)                                        | 17 (10)                                            | 4 (5)                                            | 6 (3)                                         | 10 (11)                        |
| Fibre (g)                                | 28                   | 7 (35)                                        | 87 (51)                                            | 32 (40)                                          | 51 (29)                                       | 34 (39)                        |
| Micronutrients                           | NRVs (unit/day)      |                                               |                                                    |                                                  |                                               |                                |
| Thiamin (mg)                             | EAR 1.2              | 10 (50)                                       | 130 (76)                                           | 55 (69)                                          | 113 (65)                                      | 55 (63)                        |
| Riboflavin (mg)                          | EAR 1.2              | 16 (80)                                       | 156 (91)                                           | 68 (85)                                          | 145 (83)                                      | 70 (80)                        |
| Niacin equivalents<br>(mg)               | EAR 14               | 20 (100)                                      | 170 (99)                                           | 77 (96)                                          | 173 (99)                                      | 83 (94)                        |
| Vitamin C (mg)                           | EAR 40               | 20 (100)                                      | 171 (100)                                          | 78 (98)                                          | 170 (97)                                      | 87 (99)                        |
| Dietary folate<br>equivalents (µg)       | EAR 520              | 7 (35)                                        | 94 (55)                                            | 45 (56)                                          | 83 (47)                                       | 43 (49)                        |
| Retinol equivalents<br>(µg)              | EAR 550              | 16 (80)                                       | 152 (89)                                           | 67 (84)                                          | 136 (78)                                      | 69 (78)                        |
| Magnesium (mg)<br>19-30 years old        | EAR 290              | 14 (70)                                       | 141 (83)                                           | 64 (80)                                          | 116 (66)                                      | 52 (59)                        |
| Phosphorus (mg)                          | EAR 580              | 20 (100)                                      | 169 (99)                                           | 77 (96)                                          | 169 (97)                                      | 81 (92)                        |
| Calcium (mg)                             | EAR 840              | 7 (35)                                        | 84 (49)                                            | 35 (44)                                          | 61 (35)                                       | 28 (32)                        |
| Iron (mg)                                | EAR 22               | 1 (5)                                         | 4 (2)                                              | 0 (0)                                            | 0 (0)                                         | 2 (2)                          |
| Zinc (mg)                                | EAR 9.0              | 15 (75)                                       | 128 (75)                                           | 60 (75)                                          | 116 (66)                                      | 59 (67)                        |
| Sodium (mg)                              | AI 460-920           | 1 (5)                                         | 7 (4)                                              | 6 (8)                                            | 10 (6)                                        | 10 (11)                        |
| Iodine (ug)                              | EAR 160              | 3 (15)                                        | 39 (23)                                            | 48 (60)                                          | 39 (22)                                       | 22 (25)                        |
| Potassium (mg)                           | AI 2800              | 15 (75)                                       | 128 (76)                                           | 56 (70)                                          | 99 (57)                                       | 51 (58)                        |
